# Supplementary material for: CsCIPK11-Regulated Metalloprotease CsFtsH5 Mediates the Cold Response of Tea Plants
Source: Int J Mol Sci. 2023 Mar 27;24(7):6288. doi: 10.3390/ijms24076288 (PMC10094637; doi:10.3390/ijms24076288)
Supplement: Supplementary file 1 [file ijms-24-06288-s001.zip]

Archive with 5 entries (5 files):
- Supplementary Figure S1.pdf
- Table S1 All RT-qPCR Primers used in this study.pdf
- Table S2 All RT-PCR Primers used in this study.pdf
- Table S3 The protein sequences used in this study.pdf
- Table S4 AsODNs and sODNs primer sequences in this study.pdf
