# Supplementary material for: CsCIPK11-Regulated Metalloprotease CsFtsH5 Mediates the Cold Response of Tea Plants
Source: Int J Mol Sci. 2023 Mar 27;24(7):6288. doi: 10.3390/ijms24076288 (PMC10094637; doi:10.3390/ijms24076288)
Supplement: Supplementary file 1 [file ijms-24-06288-s001.zip › Supplementary Figure S1.pdf]

## Supplementary Figures

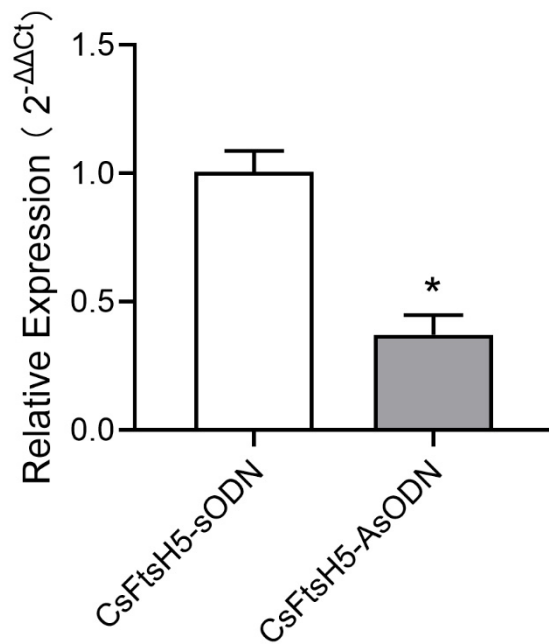

**Figure S1.** The expression of *CsFtsH5* in AsODN-*CsFtsH5* and sODN-*CsFtsH5* tea plant. Values was expressed relative to the expression levels of sODN-*CsFtsH5* group using formula  $2^{-\Delta\Delta C_t}$ . *CsPTB* was used as a reference gene in expression analysis. Data are shown as the mean  $\pm$  SEM (n=3). Asterisks indicate significant differences according to *t*-test (\* $P < 0.05$ ).
