# Supplementary material for: CsCIPK11-Regulated Metalloprotease CsFtsH5 Mediates the Cold Response of Tea Plants
Source: Int J Mol Sci. 2023 Mar 27;24(7):6288. doi: 10.3390/ijms24076288 (PMC10094637; doi:10.3390/ijms24076288)
Supplement: Supplementary file 1 [file ijms-24-06288-s001.zip › Table S1 All RT-qPCR Primers used in this study.pdf]

**Table S1 All RT-qPCR Primers used in this study**

| Primer name              | Sequences               |
|--------------------------|-------------------------|
| CsFtsH5-F                | TTCTTAGGTCAACAGGTGTCT   |
| CsFtsH5-R                | TCTGCTTGGCCCTTTCGTATG   |
| CsCIPK11-F               | CATCGAGAAAGTTGAGGAGG    |
| CsCIPK11-R               | ACCATTCAGCCCTTCCAATTCC  |
| CsCBF1-F                 | CGACTGAGACGACAATGCCGGA  |
| CsCBF1-R                 | GTCACCAAGTTCCGCGTCATCA  |
| CsCOR414-F               | TTGGGTCCTGTTTGTTACTCTG  |
| CsCOR414-R               | AGCCCAAATACCATATTACCC   |
| CsCOR47<br>(TEA010666)-F | GAAATACGAGGCAGTGGTGA    |
| CsCOR47<br>(TEA010666)-R | CTGGCCTGGTAGTTTCTCCT    |
| CsCOR47<br>(TEA010673)-F | GAGAAATACGAGGCAGTGGTG   |
| CsCOR47<br>(TEA010673)-R | TGGCCTGGTAGTTTCCCCT     |
| CsMPK3-F                 | GGGTTTCATTCGGAGCAAAGATG |
| CsMPK3-R                 | CAACAAGATCAACAGCTAATGG  |
| CsPTB-F                  | GACAGCTGGGTTCCAGGCTT    |
| CsPTB-R                  | AGCGACAGGGAGGAGAGGAT    |
