# Supplementary material for: CsCIPK11-Regulated Metalloprotease CsFtsH5 Mediates the Cold Response of Tea Plants
Source: Int J Mol Sci. 2023 Mar 27;24(7):6288. doi: 10.3390/ijms24076288 (PMC10094637; doi:10.3390/ijms24076288)
Supplement: Supplementary file 1 [file ijms-24-06288-s001.zip › Table S2 All RT-PCR Primers used in this study.pdf]

**Table S2 All RT-PCR Primers used in this study**

| Primer name       | Sequences                                   |
|-------------------|---------------------------------------------|
| CsFtsH5-F         | ATGGCTTCCACTAAACCCTT                        |
| CsFtsH5-R         | TTAGGCAACAAATAGTTCAGC                       |
| CsCIPK11-F        | ATGCCAGAGATCGAGCATGTCC                      |
| CsCIPK11-R        | TTAGTTACCGGCGACCTGCTGC                      |
| 35s-CsFtsH5-GFP-F | ggtacccggggatcctctagaATGGCTTCCACTAAACCCTT   |
| 35s-CsFtsH5-GFP-R | gcccttgctcaccatgtcgacGGCAACAAATAGTTCAGC     |
| CsFtsH5-AD-F      | gccatggaggccagtgaattcATGGCTTCCACTAAACCCTT   |
| CsFtsH5-AD-R      | cagctcgagctcgatggatccTTAGGCAACAAATAGTTCAGC  |
| CsCIPK11-BD-F     | atggccatggaggccgaattcACCTCGTTTGGAACAGG      |
| CsCIPK11-BD-R     | ccgctgcaggtcgacggatccTTAGTTACCGGCGACCTGCTGC |
| CsFtsH5-cLuc-F    | tacgctcccggggcggtaccATGGCTTCCACTAAACCCTT    |
| CsFtsH5-cLuc-R    | cagtcgacgcgtgtggatccTTAGGCAACAAATAGTTCAGC   |
| CsCIPK11-nLuc-F   | acgggggacgagctcggtaccATGCCAGAGATCGAGCATGTCC |
| CsCIPK11-nLuc-R   | cagtcgacgcgtgtggatccGTTACCGGCGACCTGCTGC     |
| 35s-CsFtsH5-Luc-F | cgaattcctgcagccggggATGGCTTCCACTAAACCC       |
| 35s-CsFtsH5-Luc-R | gctctagaactagtggatcGGCAACAAATAGTTCAGCTT     |
