# Supplementary material for: CsCIPK11-Regulated Metalloprotease CsFtsH5 Mediates the Cold Response of Tea Plants
Source: Int J Mol Sci. 2023 Mar 27;24(7):6288. doi: 10.3390/ijms24076288 (PMC10094637; doi:10.3390/ijms24076288)
Supplement: Supplementary file 1 [file ijms-24-06288-s001.zip › Table S3 The protein sequences used in this study.pdf]

**Table S3 The protein sequences used in this study**

|         |                                                                                                                                                                                                                                                                                                                                                                                                                                                                                                                                                                                                                                                                                                                                                                                    |
|---------|------------------------------------------------------------------------------------------------------------------------------------------------------------------------------------------------------------------------------------------------------------------------------------------------------------------------------------------------------------------------------------------------------------------------------------------------------------------------------------------------------------------------------------------------------------------------------------------------------------------------------------------------------------------------------------------------------------------------------------------------------------------------------------|
| CsFtsH5 | MASTKPLLSSSFHGNQIFLSPPTPKTTKCSKLLIPQSILNRRPSNTTLKNLPSQATLAALLFSS<br>ITPQQTLALDTINPPNAPPPAIQAEAPKPIPSFQSNLLMTAPKPQTQSDIPDGTQWRYSEFL<br>SAVKKKGKVERVRFSKDGTALQLTAVDGRRATVTVPSDPDLIDILASNAVDISVAEGDSGN<br>GLFSFIGNLIFPFLAFAGLFLFRRSQGGPGGGPGGPMDFGRSKSKFQEV PETGVSFSDV<br>AGADQAKLELQEVVDFLKNPDKYTALGAKIPKGCLLVGPPGTGKTLLARAVAGEAGVPF<br>FSCAASEFVELFVGVGASRVRDLFEKAKSKAPCIVFIDEIDAVGRQRGAGLGGGNDEREQ<br>TINQLLTEMDFSGNSGVIVLAATNRPDVLDSALLRPGRFDRQVTVDRPDVAGRVRILQV<br>HSRGKALAKDVDFEKISRTPGFTGADLQNLMEAAAILAARRDLKEISKDEISDALERIIAG<br>PEKKNNAVSEAKKKLVAYHEAGHALVGALMPEYDPVAKISIIPRGQAGGLTFFAPSEERL<br>ESGLYSRYSLENQMAVALGGRVAEEVIFGDDNVTTGASNDFMQVSRVARQMVERFGFSK<br>KIGQVAIGSGGNPFLGQQVSSQKDYSMATADVVDTEVRELVEKAYERAKQIITTHIDILH<br>KLALLLVEKETVDGEEFMSLFIDGKAELFVA               |
| AtFtsH1 | MASNSLLRSSNFFLGSHIISSPTPKTTRKPSFPFSFVSRAKYQITRSSQDENSPNGKPNSPFS<br>SQVALAAILLSSISSPLALAVVDEPASPSVIESQAVKPSTPSPLFIQNEILKAPSPKSSDLPE<br>GSQWRYSEFLNAVKKGKVERVRFSKDGSVVQLTAVDNRRASVIVPNDPDLIDILAMNGV<br>DISVSEGESSGNDLFTVIGNLIFLLAFGGLFLLFRRAQGGPGGGPGGLGGPMDFGRSKSKF<br>QEV PETGVSFADVAGADQAKLELQEVVDFLKNPDKYTALGAKIPKGCLLVGPPGTGKTLL<br>ARAVAGEAGVPFFSCAASEFVELFVGVGASRVRDLFEKAKSKAPCIVFIDEIDAVGRQRG<br>AGMGGGNDEREQTINQLLTEMDFSGNSGVIVLAATNRPDVLDSALLRPGRFDRQVTVDR<br>RPDVAGRVRILQVHSRGKALGKDVDFDKVARRTPGFTGADLQNLMEAAAILAARRELKE<br>ISKDEISDALERIIAGPEKKNNAVSEEEKRLVAYHEAGHALVGALMPEYDPVAKISIIPRGQ<br>AGGLTFFAPSEERLESGLYSRYSLENQMAVALGGRVAEEVIFGDENVTTGASNDFMQVSR<br>VARQMIERFGFSKIGQVAVGGPGGNPFMGQQMSSQKDYSMATADIVDAEVRELVEKA<br>YKRATEIITTHIDILHKLALLIEKETVDGEEFMSLFIDGQAELYIS |
| AtFtsH2 | MNFQMAASSACLVGNGLSVNTTTKQRLSKHFSGRQTSFSSVIRTSKVNVVKASLDGKKK<br>QEGRRDFLKILLGNAGVGLVASGKANADEQGVSSSRMSYSRFLEYLDKDRVNKVDLYEN<br>GTIAIVEAVSPELGNRVERVRVQLPGLSQELLQKLRAKNIDFAAHNAQEDQGSVLFNLIGN<br>LAFPALLIGGLFLLSRRSGGMGGPGGNPLQFGQSKAKFQMEPNTGVTFFDDVAGVDE<br>AKQDFMEVVEFLKKPERFTAVGAKIPKGVLIGPPGTGKTLLAKAIAAGEAGVPFFSISGSEF<br>VEMFVGVGASRVRDLFKKAKENAPCIVFVDEIDAVGRQRTGIGGGGNDEREQTINQLLT<br>EMDGFEGNTGVIVVAATNRADILDSALLRPGRFDRQVSVDPDVKGRTDILKVHAGNKK<br>FDNDVSLEIIAMRTPGFSGADLANLLNEAAILAGRRARTSISSEIDDSIDRIVAGMEGTVM<br>TDGKSLSLVAYHEVGHAVCGTLTPGHDAVQKVTLPGRQARGLTWFIPSDDPTLISKQQL<br>FARIVGGLGGRAAEEIIFGDSEVTTGAVGDLQQITGLARQMVTTFGMSDIGPWSLMDSSA<br>QSDVIMRMMARNMSSEKLAEDIDSAVKKLSDSAYEIALSHIKNNREAMDKLVEVLLEKE<br>TIGGDEFRAILSEFTEIPPENRVPSSTTTTPASAPTPAAV                 |
| AtFtsH3 | MTMIFFSKLNRSISRSGFLYGGGVRSAAARLLTSPGLEAASVNEVEGGLGFIRRHFAFL<br>ASRKGLVNNDLIGVFANPRLRRFFSDEAPKKKNYENYFPKDKQEPKSDQKSEHKEGS<br>EKNENENVGDMFMNRFQNLPLALAVFFSTFSFGSGEQQQISFQEFKNKLEPLGLV<br>DHIDVSNKSVAKVYVRSTPKDQQTDDVHGNNGIPAKRTGGQYKYFNIQSVDSFE<br>EKLEEAQEALGVDRHEYVPVTYVSEMVWYQEFMRFAPTTTTLTLYGARRMQGGL<br>GVGGTGGKNGRGIFNIGKATITRADKHSKNKIYFKDVAGCDEAKQEIMEFVHFLKNP                                                                                                                                                                                                                                                                                                                                                                                                               |

|         |                                                                                                                                                                                                                                                                                                                                                                                                                                                                                                                                                                                                                                                                                                                                                                                                   |
|---------|---------------------------------------------------------------------------------------------------------------------------------------------------------------------------------------------------------------------------------------------------------------------------------------------------------------------------------------------------------------------------------------------------------------------------------------------------------------------------------------------------------------------------------------------------------------------------------------------------------------------------------------------------------------------------------------------------------------------------------------------------------------------------------------------------|
|         | KKYEDLGAKIPKGALLVGPPGTGKTLLAKATAGESGVPFLSISGSDFMEMFVGVGPSR<br>VRHLFQEARQAAPSIIFIDEIDAIGRARGRGGLGGNDERESTLNQLLVEMDGFGTAG<br>VVVLAGTNRPDILDKALLRPGRFDRQITIDKPDIKGRDQIFKIYLLKKIKLDHEPSYYSQ<br>RLAALTPGFAGADIANVCNEAALIAARHEGATVTMAHFESAIDRVIGGLEKKNRISK<br>LERRTVAYHESGHAVVGWFLEHAEP LLKV TIVPRGTAALGFAQYVPNENLLMTKEQL<br>FDMTCMTLGGRAAEQVLIGKISTGAQNDLEKVTKMTYAQVAVYGFSDKVGLLSFPPR<br>DDGYDFS KPY SNKTGAII DEEVRDWVAKAYERTVELVEEHKVKVAEIAELLLEKEVLH<br>QDDLLKILGERPFKSAEVTNYDRFKSGFEETEKDSAATPTVEPVVDDGAPPPFEPQVV<br>PT                                                                                                                                                                                                                                                                             |
| AtFtsH4 | MAWRRITKVSSHERELSSLRSLV RAYSSFP RVGTGAVGGGGASLPRT RFQSSYVGS<br>FARRVRDREEVNEVAHLRELIRNDPEAVIRMFESQPSLHANASALSEYIKALVKVDR<br>LDQSELVRTLQRGIAGVAREEETFGGLGAFRNVGKPTKDGVLGTASAPIHTISTERTHF<br>KEQLWSTIRTIGVGFL LISGIGALIEDRGIGKGLGLHEEVQPSMDSSTKFS DVGKGVDEA<br>KAELEEIVHYLRDPKRFTRLGGKLPKG VLLVGPPGTGKTMLARA IAGEAGVPFFSCSG<br>SEFEEMFVGVGARRVRDLFSA AKKCSPCIIFIDEIDAIGGSRNP KDQQYMKMTLNQML<br>VELDGFKQNEGIIVVAATNFPESLDKALVRPGRFDRHIVVPNP DVEGRRQILESHMSK<br>VLKAEDVDLMIIARGTPGFSGADLANLVNVAALKAAMDGSKDVTMSDLEFAKDRIM<br>MGSERKSAVISDESRKLTA FHEGGHALVAIHTEGALPVHKATIVPRGMALGMVSQLPD<br>KDETSISRKQMLARLDVCMGGRVAEELIFGESEVTSGASSDLEQATKLARAMVTKFG<br>MSKEVGLVAHNYDDNGKSMSTETRL LIESEVKQLLEKAYNNAKTILT VYNKELHALA<br>NALLQHETLSGKQIKELLTDLNSPLLQKRQEVVTKQSNPVPPSTPSSASSAAAAA<br>AAAAAATAATKGKDMAPVS |
| AtFtsH5 | MATTSSNPLLLSSNFLGSQIIISAPTPKTTTSLPFSVISRKRYQISQSEKLMKSLPSQAA<br>LAALLFSSSSPQALAVNEPVQPAPTITAEAQSPNLSTFGQNVLMTAPNPQAQSSDLPD<br>GTQWRYSEFLNAVKKGKVERVKFSKDGSVLQLTAVDNRRATVIVPNPDLIDILAMN<br>GVDISVSEGE GGNGLFDFIGNLLFPLLA FGGLFYLF RGGQGGAGGPGGLGGPMDFGR<br>SKSKFQVEVPETGVTFGDVAGADQAKLELQEVVD FLKNPDKYTALGAKIPKGCLLVGP<br>PGTGKTLLARAVAGEAGVPFFSCAASEFVELFVGVGASRVRDLFEKAKSKAPCIVFID<br>EIDAVGRQRGAGMGGGNDEREQTINQLLTEM DGFSGNSGVIVLAATNRPDV LDSALL<br>RPGRFDRQVTVD RPDVAGRVQILKVH SRGKAIGKDVDY EKVARRTPGFTGADLQNL<br>MNEAAILAARRELKEISKDEISDALERI IAGPEKKN AVVSEEKKRLVAYHEAGHALVG<br>ALMPEYDPVAKISIIPRGQAGGLTFFAPSEERLESGLYSRSYLENQMAVALGGRVAEEVI<br>FGDENVTTGASNDFMQVSRVARQMVERFGFSKKIGQVAVGGAGGNPFLGQSMSSQK<br>DYSMATADVDDAEVRELVEKAYVRAKEIITTQIDIL HKLAQLLIEKETVDGEEFMSLFI<br>DGQAELYVS        |
| AtFtsH6 | MKMASSSSALSFP LSNIPTCSKKSQQFQKPASLSKSSHTHKPSLKTQILHHKFTKRNLL<br>SLTTALGFTSALGTVLAHPAKAEPEAPIEATSNRMSYSRFLQHLKENEVKKVDLIENG<br>VAIVEISNPVVGKIQRVRVNLPLGPVDLVREMKEKNVDFAAHPMNVNWGAFLNFLG<br>NLGFPLILLVSLLLTSSSRNPAGPNLPFGLGRSKAKFQMEPNTGITFEDVAGVDEAKQ<br>DFEEIVEFLKTPEKFSALGAKIPKG VLLTGPPGTGKTLLAKA IAGEAGVPFFSLSGSEFI<br>EMFVGVGASRARDL FNKAKANS PCIVFIDEIDAVGRMRGTGIGGGNDEREQT LNQILT<br>EMDGFAGNTGVIVIAATNRPEILDSALLRPGRFDRQVSVGLPDIRGREEILKVHSR SKK<br>LDKDVSLSVIAMRTPGFSGADLANLMNEAAILAGRRGKDKITLTEIDDSIDRIVAGME<br>GTKMIDGKSKAIVAYHEVGHAI CATLTEGHDPVQKVTLVPRGQARGLTWFLPGEDPTL                                                                                                                                                                                                              |

|          |                                                                                                                                                                                                                                                                                                                                                                                                                                                                                                                                                                                                                                                                                                                                                                                                                                                                                                     |
|----------|-----------------------------------------------------------------------------------------------------------------------------------------------------------------------------------------------------------------------------------------------------------------------------------------------------------------------------------------------------------------------------------------------------------------------------------------------------------------------------------------------------------------------------------------------------------------------------------------------------------------------------------------------------------------------------------------------------------------------------------------------------------------------------------------------------------------------------------------------------------------------------------------------------|
|          | VSKQQLFARIVGGLGGRAAEDVIFGEPEITTGAAGDLQQVTEIARQMVTMFGMSEIGP<br>WALTDPAVKQNDVVLRLARNMSSEKLAEDIDSCVKKIIGDAYEVAKKHVRNNREAI<br>DKLVDVLLEKETLTGDEFRAILSEYTDQPLNTDGDVIRINDLISV                                                                                                                                                                                                                                                                                                                                                                                                                                                                                                                                                                                                                                                                                                                             |
| AtFtsH7  | MTTTFEFLQPRIHGFATCCSSNSLLYSKASRFFNDRCRVYRQNPNRVFSNSITLPLQKK<br>QVTVLRNHERFNLWDGFSRKKSRLLVNCQEDDQNESSEEEESSQSTPAKSERKREK<br>KEDKVWWSKGKKWQWQPIIQAQGIGVLLLQLSVVMFVMRLLRPGIPLPGSEPRIQTT<br>FVSVPYSEFLSKVNSNQVQKVEVDGVQVLFKL RDDGKWQESETSRLSQSSESLLRTV<br>APTKRVVYSTTRPGDIKTPYEKMLGNNVEFGSPEKRSGGFFNSALIALFYIAVLAGLIR<br>FPVSFSTSSTGQLRTRKAGGPDGGKVS GGGETITFADVAGVDEAKEELEEIVEFLRNPE<br>KYVRLGARPPRGVLLVGLPGTGKTLAKAVAGEAEVPFISCSASEFVELYVGMGASRV<br>RDLFARAKKEAPSIIFIDEIDAVAKSRDGKFRMGSNDEREQTLNQLLTEMDGFDNSAV<br>IVLGATNRADVLDPALRRPGRFDRVTVETPDKIGRESILRVHVS KKEPLGDDVNLG<br>SIASMTTGFTGADLANLVNEAALLAGRKNKTNVEKIDFIQAVERSIAGIEKKSARLKG<br>NEKAVVARHEAGHAVVGTAVANLLTGQPRVEKLSILPRTGGALGFTYIPPTSEDYLLFI<br>DELLGRLVTLLGGRAAEV VYSGRISTGAFDDIR RATDMAYKAVA EYGLNQKIGPVSV<br>ATLSGGGIDDSGGSPWGRDQGKLV DLVQKEVTILLQSALDVALSVVRANPDVLEGLG<br>AQLEEKEKVEGEELQKWLSMVVAPEELAVFVEGKQELLPAQASSS               |
| AtFtsH8  | MAASSACLLGNGLSVYTTKQRFQKLGLDRTSKVTVVKASLDEKKHEGRRGFFKLLL<br>GNAAAGVGLLASGNANADEQQGQVSSSRMSYSRFLEYLDKGRVEKVDLYENG TIAI<br>VEAVSPELGNRIQVRVQLPGLSQELLQKLRAKNIDFAAHNAQEDQGSPILNLIGNLAF<br>PVILIGGLFLLSRRSSGGMGGPGGPGFPLQIGQSKAKFQMEPNTGVT FDDVAGVDEAK<br>QDFMEVVEFLKKPERFTAVGARIPKGVLLVGPPGTGKTLAKA IAGEAGVPFFSIGSE<br>FVEMFVGVGASRV RDLFKKAKENAPCIVFVDEIDAVGRQRGTGIGGGNDEREQTLNQ<br>LLTEMDGFEGNTGVIVVAATNRADILDSALLRPGRFDRQVSVDVPDVKGRTDILKVHS<br>GNKKFESGVSLVIAMRTPGFSGADLANLLNEAAILAGRRGKTAISSKEIDDSIDRIVA<br>GMEGTVMTDGKSKSLVAYHEVGHAICGTLTPGHDAVQKVTLIPRGQARGLTWFIPSD<br>DPTLISKQQLFARIVGGLGGRAAEVIFGESEVTTGAVSDLQQITGLAKQMVTTFGMS<br>EIGPWSLMDSSSEQSDVIMRMMARNMSSEKLANDIDTAVKTLSDKAYEIALSQIRNNRE<br>AMDKIVEILLEKETMSGDEFRAILSEFTEIPPENRVASSTSTSTPTPASV                                                                                                                                           |
| AtFtsH9  | MTSIELLSPLIHDKFRFSTCCSTSSLLYLHASSFFRDRSFGRQNPNRVFSNSSIQLPQSV<br>PGSINQERFNLWQGFSRKKSTSSSR TIVNCQEGDQKASSSEGEGKTNKDKGRKQGKN<br>ELWWSKGKKWQWKPIIQAQEIGVMLLQLGIVMFVVRLLRPGIPLPGSEPRTQTTFMS<br>VPYSDFLSKVNNDEVQKVEVDGFHVLFLKLDDGNLQESSETSSSIKLSSESSETMLRSV<br>APTKRVVYSTTRPRDIKTPYEKMLENNVEFGSPDKRS GGFFNSGLIVLFYIAVLAGLLH<br>RFPVNFSQSTTGQLRTRKSGGPGGGKVSGDGETITFADVAGVDEAKEELEEIVEFLKN<br>PDRYVRLGARPPRGVLLVGLPGTGKTLAKAVAGESDVPFISCSASEFVELYVGMGAS<br>RV RDLFARAKKEAPSIIFIDEIDAVAKSRDGKFRMVSNDEREQTLNQLLTEMDGFDSSS<br>AVIVLGATNRADVLDPALRRPGRFDRVTVESPDKVGRESILKVHVS KKEPLGDDVN<br>LASIASMTTGFTGADLANLVNEAALLAGRKSKMTVDKIDFIH AVERS IAGIEKKTARL<br>KGSEKAVVARHEAGHAVVGTAVASLLSGQSRVEKLSILPRSGGALGFTYIPPTHE DRYL<br>LFIDELHGRLVTLLGGRAAEV VYSGRISTGALDDIR RATDMAYKAVA EYGLNEKIGP<br>VSVATLSAGGIDDSGGSPWGRDQGH LVDLVQREV TNLLQSALDVALTVVRANPDVLE<br>GLGAQLEDEEKVEGEELQKWLNRVVPSEELAVFIK GKQTALLPAQASSS |
| AtFtsH10 | MIFSKLGSSLARSSRSKGFVYGGGVRSAVFNQGRRLRAPQNLEAAVNQVDGGLGLRR                                                                                                                                                                                                                                                                                                                                                                                                                                                                                                                                                                                                                                                                                                                                                                                                                                           |

|          |                                                                                                                                                                                                                                                                                                                                                                                                                                                                                                                                                                                                                                                                                                                                                                                                                                                                                                                                                                                                                                                                              |
|----------|------------------------------------------------------------------------------------------------------------------------------------------------------------------------------------------------------------------------------------------------------------------------------------------------------------------------------------------------------------------------------------------------------------------------------------------------------------------------------------------------------------------------------------------------------------------------------------------------------------------------------------------------------------------------------------------------------------------------------------------------------------------------------------------------------------------------------------------------------------------------------------------------------------------------------------------------------------------------------------------------------------------------------------------------------------------------------|
|          | <p> HFASFAARKGLEAGDLSRAFANPRLRRFFSSQTPKKKNYENYYPKDSKKAPKNEQKS<br/> ESRDGSKKNENENAGDAFSNEYQNMLIPLMAIALILSTFSLGSREQQQISFQEFKNKLL<br/> EAGLVDHIDVSNKEVAKVYVRSSPKSQTTEEVVQGPNGVPAKGRGGQYKYFYFNIGS<br/> VESFEEKLEEAQEAIGVNSHDFVPVTYVSETIWYQELLRFAPTLTLLVATLIFGARRMQG<br/> GLGGLGGPGGKAGRGIFNIGKAQITRADKNSKNKIYFKDVAGCEEAKQEIMEFVHFL<br/> QNPKKYEDLGAKIPKGALLVGPPGTGKTLLAKATAGESAVPFLSISGSDFMEMFVGVG<br/> PSVRNLFQEARQCAPSIIFIDEIDAIGRARGRGGFSGGNDERESTLNQLLVEMDGFGT<br/> TAGVVVLAGTNRPDILDKALLRPGRFDRQITIDKPDIKGRDQIFQIYLKKIKLDHEPSY<br/> YSQRLAALTPGFAGADIANVCNEAALIAARHEGATVTMAHFDSAIDRVIGGLEKKNR<br/> VISKLERRTVAYHESGHAVAGWFLHAEP LLKV TIVPRGTAALGFAQYVPNENLLMTK<br/> EQLFDMTCMTLGGRAAEQVLIGRISTGAQNDLEKVTKMTYAQVAVYGFSDKIGLLSF<br/> PQREDEFSPYSNRTGAMIDEEVREWVGKAYKRTVELIEEHKEQVAQIAELLLEKEVL<br/> HQDDLTKVLGERPFKSGGETTNYDRFKSGFEESEKESQKESVPVKPVEDDGIPPLEPQV<br/> VPT </p>                                                                                                                                                                                                 |
| AtFtsH11 | <p> MSSSTLQASLFLRPPLHTSSFKLYPCLFSSSSLSFCPQSLSSFYRLSSVLHNSRFRPLPCS<br/> LRQDNVASDSDFIPKDSAFEVTDSAESNRLVSDTEVSELETNDRFVGGEETKSGGEEA<br/> EVSNGVTEGKEEDQKKSKFRIVVLMMALWAAIKRAIEKVMWEWLSWWPFSRQEK<br/> RLEKLI AEADANPKDAALQGALLAELNKHIP EAVVQRFEQREHTVDSRGVAEYIRALV<br/> ITNAISEYLPDEQTGKPSSLPALLQELKHRASGNMDES FVNPGISEKQPLHVTMVNPK<br/> VSNKSRFAQELVSTILFTVAVGLVWIMGAAALQKYIGSLGGIGTSGVGSSSSSYSPKELN<br/> KEITPEKNVKT FDKVKGCD DAKQELEE VVEYLKNPSKFTRLGGKLPKGILLTGAPGT<br/> GKTLLAKAIAAGEAGVPFFYRAGSEFEEMFVGVGARRVRSLFQA AKKKAPCIIFIDEIDA<br/> VGSTRKQWEGHTKKT LHQLLVEMDGF EQNEGIIVMAATNLPDILDPALTRPGRFDRHI<br/> VVPSPDVRGREEILELYLQGKPMSEVDVDKAIARGTPGFNGADLANLVNIAAIKAAVE<br/> GAEKLSSEQLEFAKDRIVMGTERKTMFVSEDSKKL TAYHESGHAIVALNTKGAHPIHK<br/> ATIMPRGSALGMVTQLPSNDETSVSKRQLLARLDVCMGGRVAEELIFGLDHITTGASS<br/> DLSQATELAQYMVSSCGMSEAIGPVHIKERPSSDMQSRIDAEVVKLLREAYERVKSLL<br/> KRHEKQLHTLANALLEYETLTAEDIKRILLPKQEGEK FEEQQQEEDLVLA </p>                                                                                                                                     |
| AtFtsH12 | <p> MEIAISYKPNPLISSSTQLLKRSKSFGLVRFPAKYGLGATRKKQLFRVYASESSSGSSSN<br/> SDGGFSWVRLAQ SIRLGAERIGEKIGESVKTEIGFDSEEASGRVNEYVARVKDSVHKG<br/> HHELTRFKNETVPSFIDWNKWEHWKDIRNWDGKRVAALFIYAFALLLSCQRVYVAIQ<br/> APRVERERRELTESFMEALIPEPSPGNIEKFKRNMWRKATPKGLKLKRFIEAPDGTLVH<br/> DSSYVGENAWDDDLETTEGSLKKIIGNARIQTEAKKKLSQDLGVSGEIGDSVGNWR<br/> ERLATWKEMLEREKLSEQLNSSAAKYVVEFDMKEVEKSLREDVIGRTSETEGTRALW<br/> ISKRWWRYPKLPYTYFLQKLD SSEVA AVVFTEDLKRLYVTMKEGFPLEYIVDIPLDP<br/> YLFETICNAGVEVDLLQKRQIH YFMKVFIALLPGILILWFIRE SAMLLLITSKRFLYKKY<br/> NQLFDMAYAENFILPVGDVSETKSMYKEVV LGGDVWDLDELMIYMGNPMQYYEK<br/> DVAFVRGVLLSGPPGTGKTLFARTLAKESGLPFVFASGA EFTDSEKSGAAKINEMFSIA<br/> RRNAPAFV FVDEIDA IAGR HARKDPRRRATFEALIAQLDGEKEKTGIDRFSRLRQAVIFIC<br/> ATNRPDELDFVRSGRIDRRLYIGLPDAKQRVQIFGVHSAGKNLAEDIDFGKLVFRTV<br/> GFSGADIRNLVNEAAIMSVRKGRSYIYQQDIVDVLDKQLLEGMGVLLTEEEQQKCEQ<br/> SVSYEKKRLLAVHEAGHIVLAHLFPRFDWHA FSQLLPGGKETAVSVFYPR EDMVDQG<br/> YTTFGYMKMQMVVAHGGRCAERVVFGDNVTDGGKDDLEKITKIAREMVIS PQSARL<br/> GLTQLVKKIGMVDLPDNPDGELIKYRWDHPHVM PAEMSVEVSELFTRELTRYIEETEE </p> |

|         |                                                                                                                                                                                                                                                                                                                                                                                                                                                                                                                                                                                                                                                                                                                                                                                                   |
|---------|---------------------------------------------------------------------------------------------------------------------------------------------------------------------------------------------------------------------------------------------------------------------------------------------------------------------------------------------------------------------------------------------------------------------------------------------------------------------------------------------------------------------------------------------------------------------------------------------------------------------------------------------------------------------------------------------------------------------------------------------------------------------------------------------------|
|         | LAMNALRANRHILDLITRELLEKSRITGLEVEEKMKDLSPLMFEDFVKPFQINPDDEEL<br>LPHKDRVSYQPVDLRAAPLHRS                                                                                                                                                                                                                                                                                                                                                                                                                                                                                                                                                                                                                                                                                                             |
| AcFtsH5 | MASTTTNPLFSSRFLGNQILLSPPTPNTTKFPSLSRRKFLVPQSILNRKPNHLNSIPSQAT<br>LAALIFSSITPQALAVDTANPPNPPPVISAEAPKPIPSNSSSPFSQNLNLLTAPKPQTQTTS<br>LPEGSQWRYSEFLNAVKKGKVERVRFSKDGSAQLTAVDGRRASVIVPNDPDLIDILA<br>MNGVDISVSEGDSGNGLFSFIGNLLFPFLAFAGLFFLFRRSQGGPGGPGGLGGPMDFG<br>RSKSKFQEV PETGVTFADVAGADQAKLELQEVVDLKNPDKYTALGAKIPKGCLLVG<br>PPGTGKTLLARAVAGEAGVPPFFSCAASEFVELFVGVGASRVRDLFEKAKSKAPCIVFID<br>EIDAVGRQRGAGLGGGNDEREQ TINQLLTEM DGFSGNSGVIVLAATNRPDVLDSALL<br>RPGRFDRQVTVD RPDVAGRVKILQVHSRGKALAKDVDFEKISRRTPGFTGADLQNL<br>NEAAILAARRDLKEISKDEISDALERIIAGPEKKNAVVS EKKKKLVAYHEAGHALVGAL<br>MPEYDPVAKISIIPRGQAGGLTFFAPSEERLESGLYSRSYLENQMAVALGGRVAEEVIFG<br>EDNVT TGASNDFMQVSRVARQMVERFGFSKKIGQIAIGGPGGNPFLGQQMSSQKDYS<br>MATADIVDAEVRELVEKAYSRSKQIITTHIDILHKLAQLLIEKETVDGEEFMSLFIDGKA<br>ELFVA        |
| NtFtsH5 | MANSLLSSNFMGSQIFVSPPTPKTKYFHFH SKRKS LIPQSILNKKPNSDNSKNIPSKAA<br>LAALLFSSITPHAYALDNTTPTVPTPRVIAEAA NPTTSNPF SQNII LNAPKPQAQTNP<br>LPEVSQWRYSEFLNAVKKGKVERVRFSKDGSAQLTAVDGRRATVTVPNPDLIDILA<br>MNGVDISVSEGDSAGNGLFN LIGNLFPFIAFAGLFYLFQRSQGGPGGPGGLGGPMDFG<br>RSKSKFQEV PETGVTFADVAGADQAKLELQEVVDLKNPDKYTALGAKIPKGCLLVG<br>PPGTGKTLLARAVAGEAGVPPFFSCAASEFVELFVGVGASRVRDLFEKAKSKAPCIVFID<br>EIDAVGRQRGAGMGGGNDEREQ TINQLLTEM DGFSGNSGVIVLAATNRPDVLDSALL<br>RPGRFDRQVTVD RPDVAGRIKILQVHSRGKALT KDVD FEKIARRTPGYTGADLQNL<br>NEAAILAARRELKEISKDEISDALERIIAGPEKKNAVVSDEKKKKLVAYHEAGHALVGAL<br>MPEYDPVAKISIIPRGQAGGLTFFAPSEERLESGLYSRSYLENQMAVALGERVAEEVIFG<br>QDNVT TGASNDFMQVSRVARQMVERLGFSKKIGQVAIGGGGGNPFLGQQMSTQKDY<br>SMATADVDAEVRELVERAYERATEIITTHIDILHKLAQLLIEKETVDGEEFMSLFIDGK<br>AELYISWVSKEED |
| OsFtsH1 | MAPPCSISSASHLLITASLPKPSLRPPRLPHPKPLPAALLALAAAAPTLPALADV PAPP<br>PTQDVQVLEAPSPAANPFSNALLTAPKPTSSAAADLPEGAQWRYSEFLSAVKKGKVER<br>VRFSKDGGLQLTAIDGRRATVVPNDPDLIDILATNGVDISVAEGDAAGPGGFLAFV<br>GNLLFPFLAFAGLFFLFRRAQGGPGAGPGGLGGPMDFGRSKSKFQEV PETGVTFVDV<br>AGADQAKLELQEVVDLKNPDKYTALGAKIPKGCLLVGPPGTGKTLLARAVAGEAG<br>VPPFFSCAASEFVELFVGVGASRVRDLFEKAKAKAPCIVFIDEIDAVGRQRGAGLGGGN<br>DEREQ TINQLLTEM DGFAGNSGVIVLAATNRPDVLDAALLRPGRFDRQVTVD RPDVA<br>GRVKILEVHSRGKALAKDVDFEKIARRTPGTGADLQNL MNEAAILAARRDLKEISK<br>DEISDALERIIAGPEKKNAVVS EKKRRLVAYHEAGHALVGALMPEYDPVAKISIIPRGQ<br>AGGLTFFAPSEERLESGLYSRSYLENQMAVALGGRVAEEVIFGQENVTTGASNDFMQV<br>SRVARQMVERFGFSKKIGQVAIGGPGGNPFLGQQMSSQKDYSMATADVDAEVREL<br>VEKAYS RATQIITTHIDILHKLAQLLMEKETVDGEEFMSLFIDGQAE LFVA                                     |
| PtFtsH5 | MASSTRNPLLSSDLFGSKVLLSPPTPKTKSSFLSKNLLKIVNKKKSGSFKSLQSQATI<br>AAALLFSSLTPQALAI DN PAPPPTPPPVIEALPTKPSSPFAQNLLVTAPKPQSESTSDLPE<br>GSQWRYSEFLNAVKKGKVERVRFSKDGSTLQLSAVDGRRASVVVLNDPDLIDILARS<br>GVDISVSEGDSGN GFFNVIGSLFFPILAVAGLFFLFRRVQGGPGGPGGLGGPMDFGRSK                                                                                                                                                                                                                                                                                                                                                                                                                                                                                                                                        |

|         |                                                                                                                                                                                                                                                                                                                                                                                                                                                                                                                                                                                                                                                                                                                                                                                                    |
|---------|----------------------------------------------------------------------------------------------------------------------------------------------------------------------------------------------------------------------------------------------------------------------------------------------------------------------------------------------------------------------------------------------------------------------------------------------------------------------------------------------------------------------------------------------------------------------------------------------------------------------------------------------------------------------------------------------------------------------------------------------------------------------------------------------------|
|         | SKFQEV PETGV SFADVAGADQAKLELQEVVD FLKNPDKY TALGAKIPKGCLLVGSPG<br>TGKTLLARAVAGEAGVPFFSCAASEFVEMFVG VGASRVRDLFEKAKSKAPCIVFIDEI<br>DAVGRQRGAGLGGGNDEREQ TINQLLTEM DGFSGNSGVIVLAATNRPDV LDSALLRP<br>GRFDRQVTVD RPDIAGRVKILQVHSRGKALAKDVDFEKIARRTPGFTGADLQNL MNE<br>AAI VAARRDLKEISKDEISDALERIIAGPEKKN AVVSDEKKRLVAYHEAGHALVGALM<br>PEYDPVAKISIIPRGQAGGLTFFAPSEERLESGLYSR SYLENQMAVALGGRVAEEVIFGQ<br>DNVTTGASSDFMQVSRVARQMVERFGFSKKIGQVAIGGSGGNPFLGQQMSSQKDYS<br>MATADVVDTEVREL VETAYSRAKQIMTTHIDILHKL AQLLIEKETVDGEEFMSLFIDGK<br>AELYIA                                                                                                                                                                                                                                                                |
| VvFtsH5 | MASSSTTNPLLSSTLFGNRISTPKTTKSSIPLQFFSRRRFEVTRSILNGKPRSELPSKAAL<br>AAIIASSLAPQALAVDNATPPVPPPVIEAQPTKPSPSNSSPFAQNLLLTAPKPQTQSDLPE<br>GSQWRYSEFLNAVKKGKVERVRFSKDG SALQLTAVDGR RATVIVPNDPDLIDILAMN<br>GVDISVSEGD SGNGLFNFIGNLLFPFLAFAGLFFLFRR AQGGPGGPGGLGGPMDFGRS<br>KSKFQEV PETGVTFADVAGADQAKLELQEVVD FLKNPDKY TALGAKIPKGCLLVGPP<br>GTGKTLLARAVAGEAGVPFFSCAASEFVELFVG VGASRVRDLFEKAKSKAPCIVFIDEI<br>DAVGRQRGAGLGGGNDEREQ TINQLLTEM DGFSGNSGVIVLAATNRPDV LDSALLRP<br>GRFDRQVTVD RPDVAGRVKILQVHSRGKALAKDVDFEKIARRTPGFTGADLQNL MN<br>EAAILAARRDLKEISKDEISDALERIIAGPEKKN AVVSDEKKKLVAYHEAGHALVGAL<br>MPEYDPVAKISIIPRGQAGGLTFFAPSEERLESGLYSR SYLENQMAVALGGRVAEEVIFG<br>EDNVTTGASNDFMQVSRVARQMVERFGFSKKIGQVAIGGPGGNPFLGQQMSSQKDY<br>SMATADIVDAEVRELVEKAYSRAKQIMTTHIDILHKL AQLLIEKETVDGEEFMSLFIDG<br>KAELFVA |
| ZmFtsH5 | MAPPSVSASHLLITASLPKPKPSSLRPPRLPLAKPLPASAALLALAASPALAADAPAPAP<br>APTPAPAPELQAEAPTPTVNPFS SLLTAPKPSAAASDLPEGAQWRYSEFLSAV KR GKV<br>ERVRFSKDGGLLQLTAVDGR RATVVVPNDPDLIDILATNGVDISVSEGESAGPGGFVAF<br>VGNLLFPFIAFAGLFFLFRR AQGGPGAGPGGLGGPMDFGRSKSKFQEV PETGVTFLDV<br>AGADQAKLELQEVVD FLKNPDKY TALGAKIPKGCLLVGPPGTGKTLLARAVAGEAG<br>VPFFSCAASEFVELFVG VGASRVRDLFEKAKAKAPCIVFIDEIDAVGRQRGAGLGGGN<br>DEREQ TINQLLTEM DGFAGNSGVIVLAATNRPDV LDSALLRPGRFDRQVTVD RPDA<br>GRVKILEVHSRGKALAKDVDFDKIARRTPGFTGADLQNL MNEAAILAARRDLKEISK<br>DEISDALERIIAGPEKKN AVVSEEKKRLVAYHEAGHALVGALMPEYDPVAKISIIPRGQ<br>AGGLTFFAPSEERLESGLYSR SYLENQMAVALGGRVAEEVIFGQDNVTTGASNDFMQV<br>SRVARQMVERFGFSKKIGQVAIGGPGGNPFLGQQMSSQKDYSMATADVVD AEVREL V<br>EKAYSRA RQIITTHIDILHKL AQLLIEKETVDGEEFMSLFIDGQAELFVA                     |
